# Supplementary material for: Radiological and Clinical Significance of Cervical Dynamic Magnetic Resonance Imaging for Cervical Spondylotic Myelopathy
Source: PubMed Central journal article supplement — Neurospine. 2024 Jun 30;21(2):443–54. doi: 10.14245/ns.2448166.083 (PMC11224733; doi:10.14245/ns.2448166.083), 2024-06-30
Supplement: ns-2448166-083-Supplementary-Fig-2.pdf [file ns-2448166-083-Supplementary-Fig-2.pdf]

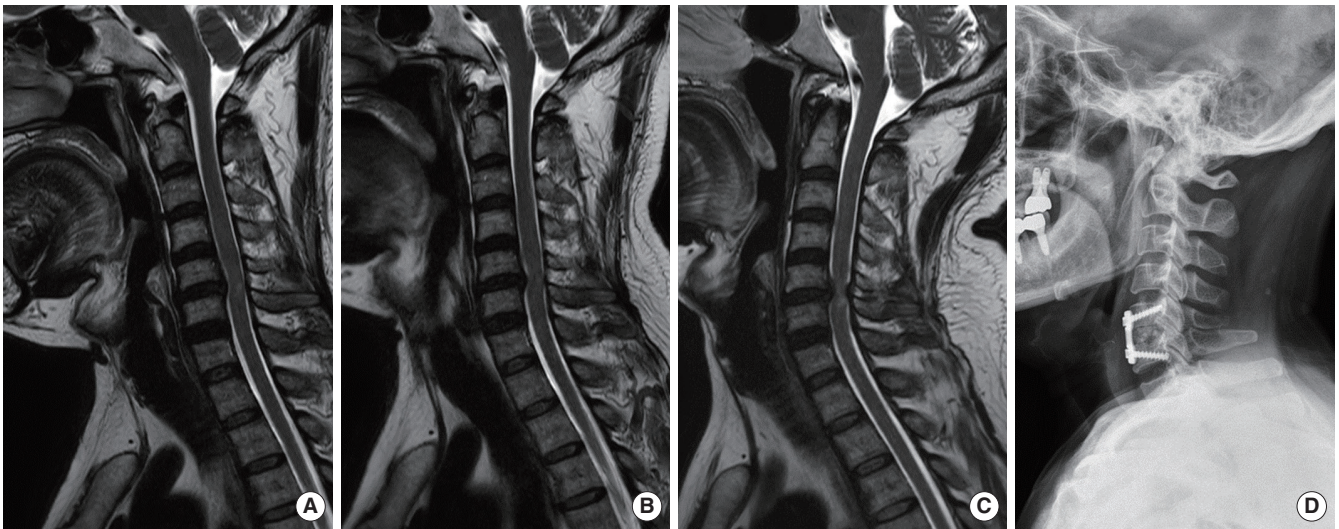

**Supplementary Fig. 2.** Mild cord compression in neutral-positioned magnetic resonance imaging (MRI). A 55-year-old female was diagnosed with cervical spondylotic myelopathy due to a herniated cervical disc and bony spur at C5–6. (A) Flexion-positioned MRI showed mild cord compression decrease and no effacement of the subarachnoid space at C5–6. (B) Neutral-positioned MRI showed a partial anterior subarachnoid space at C5–6. (C) Extension-positioned MRI showed severe cord impingement at C5–6 and intense intramedullary SI (G2). (D) We performed anterior cervical discectomy and fusion C5–6, and she experienced an improvement in her arm and leg weakness and numbness.
